# Supplementary material
Source: Springer Nature journal article supplement (https://www.springerprofessional.de/resource/supplementary/13677_2012_21_MOESM12_ESM.pdf/10743430)
Supplement: MOESM12 [file 10743430]

| To                                    | Routing Key           | Arguments |        |
|---------------------------------------|-----------------------|-----------|--------|
| <b>compute</b><br>Queue               | compute               |           | Unbind |
| <b>compute.openstack-1</b><br>Queue   | compute.openstack-1   |           | Unbind |
| <b>compute.openstack-2</b><br>Queue   | compute.openstack-2   |           | Unbind |
| <b>compute.openstack-3</b><br>Queue   | compute.openstack-3   |           | Unbind |
| <b>compute.openstack-4</b><br>Queue   | compute.openstack-4   |           | Unbind |
| <b>network</b><br>Queue               | network               |           | Unbind |
| <b>network.openstack-1</b><br>Queue   | network.openstack-1   |           | Unbind |
| <b>scheduler</b><br>Queue             | scheduler             |           | Unbind |
| <b>scheduler.openstack-1</b><br>Queue | scheduler.openstack-1 |           | Unbind |
